# Supplementary material for: Association of Leisure-Time Physical Activity Across the Adult Life Course With All-Cause and Cause-Specific Mortality
Source: PubMed Central journal article supplement (PMC6484624; doi:10.1001/jamanetworkopen.2019.0355), 2019-03-08
Supplement: jamanetwopen-2-e190355-s001.pdf [file jamanetwopen-2-e190355-s001.pdf]

## Supplementary Online Content

Saint-Maurice PF, Coughlan D, Kelly SP, et al. Association of leisure-time physical activity across the adult life course with all-cause and cause-specific mortality. *JAMA Netw Open*. 2019;2(3):e190355. doi:10.1001/jamanetworkopen.2019.0355

**eTable 1.** Complete Distributions of Categorical Covariates Amongst Participants Belonging to the ‘Maintainers’ Trajectories (of Leisure-Time Physical Activity)

**eTable 2.** Complete Distributions of Categorical Covariates Amongst Participants Belonging to the ‘Increaseers’ or ‘Decreasers’ Trajectories (of Leisure-Time Physical Activity)

**eTable 3.** Hazard Ratios (95% Confidence Intervals) for All-Cause, Cardiovascular Disease (CVD), and Cancer Mortality for Leisure-Time Physical Activity Maintainers

**eTable 4.** Hazard Ratios (95% Confidence Intervals) for All-Cause, Cardiovascular Disease (CVD), and Cancer Mortality for Leisure-Time Physical Activity Trajectory Groups ‘Increaseers’ and ‘Decreasers’

**eTable 5.** Hazard Ratios (95% Confidence Intervals) Among the Trajectory Groups ‘Maintainers’ After Excluding Early Deaths (First Two Years)

**eTable 6.** Hazard Ratios (95% Confidence Intervals) Among the Trajectory Groups ‘Increaseers’ and ‘Decreasers’ After Excluding Early Deaths (First Two Years)

**eTable 7.** Hazard Ratios (95% Confidence Intervals) Among Trajectory Groups ‘Maintainers’ After Excluding Individuals With Trajectory Assignment Probabilities Lower Than 80%

**eTable 8.** Hazard Ratios (95% Confidence Intervals) Among Increaseers and Decreasers After Excluding Individuals With Trajectory Assignment Probabilities Lower Than 80%

**eFigure 1.** Item Included in the AARP Risk Factor Questionnaire to Assess Participation in Leisure-Time Physical Activity at Ages 15-18 Years, 19-29 Years, 35-39 Years, and in the Previous 10 Years (Assumed as 40-61 Years)

**eFigure 2.** Leisure-Time Physical Activity (LTPA) Trajectories and Respective Hazard Ratios (95% Confidence Intervals) for All-Cause Mortality Among Maintainers (A), Increaseers (B), and Decreasers (C)

**eFigure 3.** Leisure-Time Physical Activity (LTPA) Trajectories and Respective Hazard Ratios (95% Confidence Intervals) for Men (n=183,453) and Women (n=131,606)

**eFigure 4.** Leisure-Time Physical Activity (LTPA) Trajectories and Respective Hazard Ratios (95% Confidence Intervals) for All-Cause Mortality Among Maintainers (A), Increasesers (B), and Decreasers (C)

This supplementary material has been provided by the authors to give readers additional information about their work.

**eTable 1.** Complete Distributions of Categorical Covariates Amongst Participants Belonging to the ‘Maintainers’ Trajectories (of Leisure-Time Physical Activity)

| Trajectory                          | 1 (REF)       | 5             | 7             | 8             | 10           |
|-------------------------------------|---------------|---------------|---------------|---------------|--------------|
| N                                   | 13,170        | 48,195        | 72,783        | 32,608        | 9,898        |
|                                     |               |               |               |               |              |
|                                     | N (%)         | N (%)         | N (%)         | N (%)         | N (%)        |
| Males                               | 6,588, (50.0) | 24,963 (51.8) | 42,868 (58.9) | 21,875 (67.1) | 7,347 (74.2) |
| Females                             | 6,582 (50.0)  | 23,232 (48.2) | 29,915 (41.1) | 10,733 (32.9) | 2,551 (25.8) |
|                                     |               |               |               |               |              |
| BMI - at 18 years                   |               |               |               |               |              |
| BMI < 25.0 kg/m <sup>2</sup>        | 10,049 (76.3) | 38,878 (80.7) | 60,506 (83.1) | 27,479 (84.3) | 8,391 (84.8) |
| 25.0 ≤ BMI < 30.0 kg/m <sup>2</sup> | 1,203 (9.1)   | 4,039 (8.4)   | 6,094 (8.4)   | 2,868 (8.8)   | 928 (9.4)    |
| BMI ≥ 30.0 kg/m <sup>2</sup>        | 357 (2.7)     | 942 (2.0)     | 780 (1.1)     | 358 (1.1)     | 102 (1.0)    |
| Unknown                             | 1,561 (11.9)  | 4,336 (9.0)   | 5,403 (7.4)   | 1,903 (5.8)   | 477 (4.8)    |
|                                     |               |               |               |               |              |
| BMI - current                       |               |               |               |               |              |
| BMI < 25.0 kg/m <sup>2</sup>        | 4,257 (32.3)  | 17,037 (35.4) | 28,030 (38.5) | 13,233 (40.6) | 4,279 (43.2) |
| 25.0 ≤ BMI < 30.0 kg/m <sup>2</sup> | 4,925 (37.4)  | 19,036 (39.5) | 31,122 (42.8) | 14,212 (43.6) | 4,181 (42.2) |
| BMI ≥ 30.0 kg/m <sup>2</sup>        | 3,611 (27.4)  | 11,052 (22.9) | 12,252 (16.8) | 4,627 (14.2)  | 1,285 (13.0) |
| Unknown                             | 377 (2.9)     | 1,070 (2.2)   | 1,379 (1.9)   | 536 (1.6)     | 153 (1.6)    |
|                                     |               |               |               |               |              |
| Race                                |               |               |               |               |              |
| Non-Hispanic White                  | 11,840 (89.9) | 44,164 (91.6) | 68,154 (93.6) | 30,742 (94.3) | 9,342 (94.4) |
| Non-Hispanic Black                  | 618 (4.7)     | 1,922 (4.0)   | 1,840 (2.5)   | 723 (2.2)     | 219 (2.2)    |
| Hispanic                            | 272 (2.1)     | 828 (1.7)     | 1,068 (1.5)   | 448 (1.4)     | 133 (1.3)    |
| Other                               | 292 (2.2)     | 760 (1.6)     | 895 (1.2)     | 390 (1.2)     | 126 (1.3)    |
| Unknown                             | 148 (1.1)     | 521 (1.1)     | 826 (1.1)     | 305 (0.9)     | 78 (0.8)     |
|                                     |               |               |               |               |              |
| Education                           |               |               |               |               |              |
| <8 years                            | 230 (1.8)     | 249 (0.5)     | 301 (0.4)     | 76 (0.2)      | 16 (0.2)     |
| 8-11 years                          | 1,105 (8.4)   | 2,422 (5.0)   | 3,159 (4.3)   | 876 (2.7)     | 208 (2.1)    |

|                              |              |               |               |               |              |
|------------------------------|--------------|---------------|---------------|---------------|--------------|
| High-school                  | 3,484 (26.5) | 10,239 (21.2) | 13,666 (18.8) | 4,660 (14.3)  | 1,227 (12.4) |
| Post high-school             | 1,254 (9.5)  | 4,735 (9.8)   | 7,715 (10.6)  | 2,727 (8.4)   | 813 (8.2)    |
| Some college                 | 2,614 (19.9) | 10,629 (22.1) | 17,724 (24.4) | 7,295 (22.4)  | 2,045 (20.7) |
| College graduate             | 1,952 (14.8) | 8,773 (18.2)  | 14,131 (19.4) | 7,478 (22.9)  | 2,470 (25.0) |
| Post-graduate                | 2,170 (16.5) | 9,946 (20.6)  | 14,129 (19.4) | 8,812 (27.0)  | 2,929 (29.6) |
| Unknown                      | 361 (2.7)    | 1,202 (2.5)   | 1,958 (2.7)   | 684 (2.1)     | 190 (1.9)    |
|                              |              |               |               |               |              |
| Smoking status/dose          |              |               |               |               |              |
| Never smoked                 | 5,175 (39.3) | 18,259 (37.9) | 26,216 (36.0) | 11,682 (35.8) | 3,137 (31.7) |
| Quit: ≤20 cigs/day           | 3,090 (23.5) | 13,141 (27.3) | 20,892 (28.7) | 9,865 (30.3)  | 3,067 (31.0) |
| Quit: >20 cigs/day           | 2,684 (20.4) | 9,754 (20.2)  | 14,924 (20.5) | 7,379 (22.6)  | 2,807 (28.4) |
| Current smoker: ≤20 cigs/day | 1,041 (7.9)  | 3,552 (7.4)   | 5,573 (7.7)   | 1,771 (5.4)   | 408 (4.1)    |
| Current smoker: >20 cigs/day | 645 (4.9)    | 1,889 (3.9)   | 2,815 (3.9)   | 887 (2.7)     | 165 (1.7)    |
| Unknown                      | 535 (4.1)    | 1600 (3.3)    | 2,363 (3.3)   | 1,024 (3.1)   | 314 (3.2)    |
|                              |              |               |               |               |              |
| Vitamin/mineral suppl.       |              |               |               |               |              |
| No                           | 4,404 (33.4) | 13,783 (28.6) | 19,781 (27.2) | 8,448 (25.9)  | 2,465 (24.9) |
| Yes, < once/month            | 743 (5.6)    | 2,566 (5.3)   | 3,387 (4.7)   | 1,583 (4.9)   | 424 (4.3)    |
| Yes, once/month or more      | 7,454 (56.6) | 30,115 (62.5) | 46,902 (64.4) | 21,528 (66.0) | 6,719 (67.9) |
| Unknown                      | 569 (4.3)    | 1,731 (3.59)  | 2,713 (3.7)   | 1,050 (3.2)   | 290 (2.9)    |

Abbreviations: REF: referent group; BMI: body mass index; cigs: cigarettes; suppl: supplementation

**eTable 2.** Complete Distributions of Categorical Covariates Amongst Participants Belonging to the ‘Increasers’ or ‘Decreasers’ Trajectories (of Leisure-Time Physical Activity)

| Trajectory                          | Increasers    |               | Decreasers    |               |               |
|-------------------------------------|---------------|---------------|---------------|---------------|---------------|
|                                     | 2             | 3             | 4             | 6             | 9             |
| N                                   | 25,094        | 16,099        | 16,611        | 35,846        | 44,755        |
|                                     |               |               |               |               |               |
|                                     | N (%)         | N (%)         | N (%)         | N (%)         | N (%)         |
| Males                               | 13,675 (54.5) | 5,677 (35.3)  | 7,155 (43.1)  | 22,492 (62.8) | 30,811 (68.8) |
| Females                             | 11,419 (45.5) | 10,422 (67.7) | 9,456 (56.9)  | 13,352 (37.3) | 13,944 (31.2) |
|                                     |               |               |               |               |               |
| BMI - at 18 years                   |               |               |               |               |               |
| BMI < 25.0 kg/m <sup>2</sup>        | 20,575 (82.0) | 13,173 (81.8) | 13,724 (82.6) | 29,468 (82.2) | 37,051 (82.8) |
| 25.0 ≤ BMI < 30.0 kg/m <sup>2</sup> | 2,101 (8.4)   | 1,076 (6.7)   | 1,270 (7.7)   | 3,508 (9.8)   | 4,334 (9.7)   |
| BMI ≥ 30.0 kg/m <sup>2</sup>        | 464 (1.9)     | 247 (1.5)     | 275 (1.7)     | 552 (1.5)     | 736 (1.6)     |
| Unknown                             | 1,954 (7.8)   | 1,603 (10.0)  | 1,342 (8.1)   | 2,318 (6.5)   | 2,634 (5.9)   |
|                                     |               |               |               |               |               |
| BMI - current                       |               |               |               |               |               |
| BMI < 25.0 kg/m <sup>2</sup>        | 11,997 (47.8) | 7,542 (46.9)  | 5,587 (33.6)  | 9,441 (26.3)  | 13,047 (29.2) |
| 25.0 ≤ BMI < 30.0 kg/m <sup>2</sup> | 9,615 (38.3)  | 5,799 (36.0)  | 6,582 (39.6)  | 14,986 (41.8) | 19,173 (42.8) |
| BMI ≥ 30.0 kg/m <sup>2</sup>        | 3,015 (12.0)  | 2,406 (15.0)  | 4,124 (24.8)  | 10,762 (30.0) | 11,783 (26.3) |
| Unknown                             | 467 (1.9)     | 352 (2.2)     | 318 (1.9)     | 657 (1.8)     | 752 (1.7)     |
|                                     |               |               |               |               |               |
| Race                                |               |               |               |               |               |
| Non-Hispanic White                  | 23,390 (93.2) | 15,045 (93.5) | 15,499 (93.3) | 33,161 (92.5) | 41,312 (92.3) |
| Non-Hispanic Black                  | 597 (2.4)     | 447 (2.8)     | 514 (3.1)     | 1,353 (3.8)   | 1,554 (3.5)   |
| Hispanic                            | 423 (1.7)     | 250 (1.6)     | 243 (1.5)     | 500 (1.4)     | 760 (1.7)     |
| Other                               | 414 (1.7)     | 183 (1.1)     | 186 (1.1)     | 406 (1.1)     | 681 (1.5)     |
| Unknown                             | 270 (1.1)     | 174 (1.1)     | 169 (1.0)     | 426 (1.2)     | 448 (1.0)     |
|                                     |               |               |               |               |               |
| Education                           |               |               |               |               |               |
| <8 years                            | 104 (0.4)     | 80 (0.5)      | 58 (0.4)      | 162 (0.5)     | 118 (0.3)     |

|                              |               |               |               |               |               |
|------------------------------|---------------|---------------|---------------|---------------|---------------|
| 8-11 years                   | 1,032 (4.1)   | 822 (5.1)     | 737 (4.4)     | 1,355 (3.8)   | 1,420 (3.2)   |
| High-school                  | 4,486 (17.9)  | 4,026 (25.0)  | 3,275 (19.7)  | 5,738 (16.0)  | 6,875 (15.4)  |
| Post high-school             | 2,211 (8.8)   | 1,750 (10.9)  | 1,929 (11.6)  | 3,792 (10.6)  | 4,261 (9.5)   |
| Some college                 | 5,447 (21.7)  | 3,693 (22.9)  | 4,227 (25.5)  | 9,591 (26.8)  | 10,600 (23.7) |
| College graduate             | 5,108 (20.4)  | 2,702 (16.8)  | 2,961 (17.8)  | 7,116 (19.9)  | 9,830 (22.0)  |
| Post-graduate                | 6,137 (24.5)  | 2,627 (16.3)  | 2,987 (18.0)  | 7,196 (20.1)  | 10,708 (23.9) |
| Unknown                      | 569 (2.3)     | 399 (2.5)     | 437 (2.6)     | 896 (2.5)     | 943 (2.1)     |
|                              |               |               |               |               |               |
| Smoking status/dose          |               |               |               |               |               |
| Never smoked                 | 9,129 (36.4)  | 6,653 (41.3)  | 5,979 (36.0)  | 10,966 (30.6) | 14,861 (33.2) |
| Quit: ≤20 cigs/day           | 7,768 (31.0)  | 4,661 (29.0)  | 4,536 (27.3)  | 9,317 (26.0)  | 12,141 (27.1) |
| Quit: >20 cigs/day           | 5,741 (22.9)  | 2,663 (16.5)  | 3,359 (20.2)  | 9,223 (25.7)  | 10,897 (24.4) |
| Current smoker: ≤20 cigs/day | 1,155 (4.6)   | 1,162 (7.2)   | 1,445 (8.7)   | 3,090 (8.6)   | 3,283 (7.3)   |
| Current smoker: >20 cigs/day | 453 (1.8)     | 455 (2.8)     | 786 (4.7)     | 2,137 (6.0)   | 2,207 (4.9)   |
| Unknown                      | 848 (3.4)     | 505 (3.1)     | 506 (3.1)     | 1,113 (3.1)   | 1,366 (3.1)   |
|                              |               |               |               |               |               |
| Vitamin/mineral supp.        |               |               |               |               |               |
| No                           | 5,785 (23.1)  | 3,847 (23.9)  | 4,416 (26.6)  | 10,538 (29.4) | 13,366 (29.9) |
| Yes, < once/month            | 1,120 (4.5)   | 752 (4.7)     | 878 (5.3)     | 1,898 (5.3)   | 2,391 (5.3)   |
| Yes, once/month or more      | 17,291 (68.9) | 10,893 (67.7) | 10,745 (64.7) | 22,220 (62.0) | 27,547 (61.6) |
| Unknown                      | 898 (3.6)     | 607 (3.77)    | 572 (3.44)    | 1,190 (3.32)  | 1,451 (3.3)   |

Abbreviations: REF: referent group; BMI: body mass index; cigs: cigarettes; suppl: supplementation

**eTable 3.** Hazard Ratios (95% Confidence Intervals) for All-Cause, Cardiovascular Disease (CVD), and Cancer Mortality for Leisure-Time Physical Activity Maintainers

| Trajectory       | Maintainers |                          |                          |                          |                          |
|------------------|-------------|--------------------------|--------------------------|--------------------------|--------------------------|
|                  | 1<br>(REF)  | 5                        | 7                        | 8                        | 10                       |
| N                | 13,170      | 48,195                   | 72,783                   | 32,608                   | 9,898                    |
| All-cause Deaths | 3,789       | 11,214                   | 15,494                   | 6,241                    | 1,874                    |
| Model 1          | 1.00        | <b>0.79 (0.77, 0.82)</b> | <b>0.66 (0.64, 0.69)</b> | <b>0.58 (0.66, 0.60)</b> | <b>0.55 (0.52, 0.58)</b> |
| Model 2          | 1.00        | <b>0.84 (0.81, 0.87)</b> | <b>0.70 (0.67, 0.72)</b> | <b>0.65 (0.62, 0.68)</b> | <b>0.63 (0.60, 0.67)</b> |
| Model 3          | 1.00        | <b>0.84 (0.81, 0.87)</b> | <b>0.71 (0.68, 0.73)</b> | <b>0.66 (0.63, 0.68)</b> | <b>0.64 (0.60, 0.68)</b> |
| CVD Deaths       | 1,237       | 3,545                    | 4,755                    | 1,850                    | 579                      |
| Model 1          | 1.00        | <b>0.77 (0.72, 0.82)</b> | <b>0.61 (0.58, 0.66)</b> | <b>0.51 (0.48, 0.55)</b> | <b>0.50 (0.46, 0.55)</b> |
| Model 2          | 1.00        | <b>0.81 (0.76, 0.87)</b> | <b>0.65 (0.61, 0.69)</b> | <b>0.57 (0.53, 0.62)</b> | <b>0.57 (0.52, 0.63)</b> |
| Model 3          | 1.00        | <b>0.82 (0.77, 0.88)</b> | <b>0.66 (0.62, 0.70)</b> | <b>0.58 (0.54, 0.63)</b> | <b>0.58 (0.53, 0.64)</b> |
| Cancer Deaths    | 744         | 2,519                    | 3,790                    | 1,540                    | 477                      |
| Model 1          | 1.00        | <b>0.91 (0.84, 0.99)</b> | <b>0.84 (0.78, 0.91)</b> | <b>0.75 (0.69, 0.82)</b> | <b>0.75 (0.67, 0.84)</b> |
| Model 2          | 1.00        | 0.99 (0.88, 1.04)        | <b>0.89 (0.82, 0.97)</b> | <b>0.85 (0.77, 0.92)</b> | <b>0.86 (0.76, 0.96)</b> |
| Model 3          | 1.00        | 0.96 (0.88, 1.04)        | <b>0.90 (0.83, 0.97)</b> | <b>0.85 (0.78, 0.93)</b> | <b>0.86 (0.77, 0.97)</b> |

Model 1: Age + sex

Model 2: Model 1 + education + race + smoking status/dose + total energy intake + diet percent fat + alcohol consumption + red meat consumption + consumption of fruits + consumption of vegetables + vitamin/mineral supplementation

Model 3: Model 2 + body mass index at age 18 years

Abbreviations: REF: Referent group

**eTable 4.** Hazard Ratios (95% Confidence Intervals) for All-Cause, Cardiovascular Disease (CVD), and Cancer Mortality for Leisure-Time Physical Activity Trajectory Groups ‘Increasers’ and ‘Decreasers’

|                  | <b>Maintainers</b> | <b>Increasers</b>        |                          | <b>Decreasers</b>        |                          |                          |
|------------------|--------------------|--------------------------|--------------------------|--------------------------|--------------------------|--------------------------|
| Trajectory       | 1 (REF)            | 2                        | 3                        | 4                        | 6                        | 9                        |
| N                | 13,170             | 25,094                   | 16,099                   | 16,611                   | 35,846                   | 44,755                   |
| All-cause Deaths | 3,789              | 4,592                    | 2,969                    | 4,319                    | 10,138                   | 10,747                   |
| Model 1          | 1.00               | <b>0.57 (0.55, 0.59)</b> | <b>0.62 (0.59, 0.65)</b> | <b>0.89 (0.85, 0.93)</b> | 0.96 (0.93, 1.00)        | <b>0.82 (0.79, 0.85)</b> |
| Model 2          | 1.00               | <b>0.64 (0.62, 0.67)</b> | <b>0.68 (0.64, 0.71)</b> | <b>0.91 (0.87, 0.95)</b> | <b>0.95 (0.92, 0.99)</b> | <b>0.86 (0.83, 0.89)</b> |
| Model 3          | 1.00               | <b>0.65 (0.62, 0.68)</b> | <b>0.68 (0.65, 0.72)</b> | <b>0.92 (0.88, 0.96)</b> | 0.96 (0.92, 1.00)        | <b>0.86 (0.83, 0.90)</b> |
| CVD Deaths       | 1,237              | 1,345                    | 810                      | 1,321                    | 3,293                    | 3,484                    |
| Model 1          | 1.00               | <b>0.50 (0.47, 0.55)</b> | <b>0.53 (0.49, 0.58)</b> | <b>0.84 (0.78, 0.91)</b> | 0.94 (0.88, 1.01)        | <b>0.81 (0.75, 0.86)</b> |
| Model 2          | 1.00               | <b>0.56 (0.52, 0.61)</b> | <b>0.57 (0.53, 0.63)</b> | <b>0.87 (0.80, 0.94)</b> | 0.95 (0.89, 1.01)        | <b>0.85 (0.80, 0.91)</b> |
| Model 3          | 1.00               | <b>0.57 (0.53, 0.61)</b> | <b>0.58 (0.53, 0.64)</b> | <b>0.88 (0.81, 0.95)</b> | 0.96 (0.90, 1.03)        | <b>0.86 (0.81, 0.92)</b> |
| Cancer Deaths    | 744                | 1,134                    | 716                      | 906                      | 2,098                    | 2,464                    |
| Model 1          | 1.00               | <b>0.73 (0.67, 0.80)</b> | <b>0.76 (0.68, 0.84)</b> | 0.95 (0.86, 1.04)        | 1.02 (0.94, 1.11)        | 0.97 (0.89, 1.05)        |
| Model 2          | 1.00               | <b>0.84 (0.77, 0.92)</b> | <b>0.83 (0.75, 0.92)</b> | 0.96 (0.87, 1.05)        | 0.99 (0.91, 1.08)        | 0.99 (0.92, 1.08)        |
| Model 3          | 1.00               | <b>0.84 (0.77, 0.92)</b> | <b>0.83 (0.75, 0.93)</b> | 0.96 (0.87, 1.06)        | 0.99 (0.91, 1.08)        | 0.99 (0.92, 1.08)        |

Model 1: Age + sex

Model 2: Model 1 + education + race + smoking status/dose + total energy intake + diet percent fat + alcohol consumption + red meat consumption + consumption of fruits + consumption of vegetables + vitamin/mineral supplementation

Model 3: Model 2 + body mass index at age 18 years

Abbreviations: REF: Referent group



**eTable 5.** Hazard Ratios (95% Confidence Intervals) Among the Trajectory Groups ‘Maintainers’ After Excluding Early Deaths (First Two Years)

| <b>Maintainers</b>               |            |                          |                          |                          |                          |
|----------------------------------|------------|--------------------------|--------------------------|--------------------------|--------------------------|
| Trajectory                       | 1<br>(REF) | 5                        | 7                        | 8                        | 10                       |
| N                                | 12,861     | 47,350                   | 71,844                   | 32,329                   | 9,783                    |
| % of initial sample <sup>1</sup> | 97.7       | 98.2                     | 98.7                     | 99.1                     | 98.8                     |
| All-cause Deaths                 | 3,488      | 10,393                   | 14,598                   | 5,885                    | 1,763                    |
| Model 3                          | 1.00       | <b>0.85 (0.81, 0.88)</b> | <b>0.72 (0.69, 0.75)</b> | <b>0.67 (0.64, 0.70)</b> | <b>0.65 (0.61, 0.69)</b> |
| CVD Deaths                       | 1,136      | 3,246                    | 4,414                    | 1,714                    | 545                      |
| Model 3                          | 1.00       | <b>0.81 (0.76, 0.87)</b> | <b>0.66 (0.62, 0.70)</b> | <b>0.58 (0.54, 0.63)</b> | <b>0.59 (0.53, 0.66)</b> |
| Cancer Deaths                    | 662        | 2,314                    | 3,542                    | 1,430                    | 437                      |
| Model 3                          | 1.00       | 0.99 (0.91, 1.08)        | 0.94 (0.86, 1.02)        | <b>0.88 (0.80, 0.97)</b> | 0.88 (0.78, 1.00)        |

<sup>1</sup>(Number of participants after exclusions/Number of participants on original sample) X 100

Model 3: Age + Sex + education + race + smoking status/dose + total energy intake + diet percent fat + alcohol consumption + red meat consumption + consumption of fruits + consumption of vegetables + vitamin/mineral supplementation + body mass index at age 18 years

Abbreviations: REF: Referent group

**eTable 6.** Hazard Ratios (95% Confidence Intervals) Among the Trajectory Groups ‘Increasers’ and ‘Decreasers’ After Excluding Early Deaths (First Two Years)

|                                  | Maintainers | Increasers               |                          | Decreasers               |                   |                          |
|----------------------------------|-------------|--------------------------|--------------------------|--------------------------|-------------------|--------------------------|
| Trajectory                       | 1 (REF)     | 2                        | 3                        | 4                        | 6                 | 9                        |
| N                                | 12,861      | 24,828                   | 15,919                   | 16,271                   | 35,048            | 43,914                   |
| % of initial sample <sup>1</sup> | 97.7        | 98.9                     | 98.9                     | 98.0                     | 97.8              | 98.1                     |
| All-cause Deaths                 | 1,784       | 4,343                    | 2,797                    | 3,991                    | 9,368             | 9,932                    |
| Model 3                          | 1.00        | <b>0.66 (0.63, 0.69)</b> | <b>0.69 (0.66, 0.73)</b> | <b>0.92 (0.88, 0.96)</b> | 0.96 (0.93, 1.00) | <b>0.87 (0.83, 0.90)</b> |
| CVD Deaths                       | 1,136       | 1,261                    | 751                      | 1,202                    | 3,014             | 3,156                    |
| Model 3                          | 1.00        | <b>0.57 (0.53, 0.62)</b> | <b>0.58 (0.53, 0.63)</b> | <b>0.86 (0.80, 0.94)</b> | 0.96 (0.89, 1.03) | <b>0.85 (0.79, 0.91)</b> |
| Cancer Deaths                    | 424         | 1,049                    | 666                      | 828                      | 1,928             | 2,269                    |
| Model 3                          | 1.00        | <b>0.87 (0.79, 0.96)</b> | <b>0.86 (0.78, 0.96)</b> | 0.98 (0.89, 1.09)        | 1.03 (0.94, 1.12) | 1.03 (0.94, 1.12)        |

<sup>1</sup>(Number of participants after exclusions/Number of participants on original sample) X 100

Model 3: Age + Sex + education + race + smoking status/dose + total energy intake + diet percent fat + alcohol consumption + red meat consumption + consumption of fruits + consumption of vegetables + vitamin/mineral supplementation + body mass index at age 18 years

Abbreviations: REF: Referent group

**eTable 7.** Hazard Ratios (95% Confidence Intervals) Among Trajectory Groups ‘Maintainers’ After Excluding Individuals With Trajectory Assignment Probabilities Lower Than 80%

|                                  | <b>Maintainers</b> |                          |                          |                          |                          |
|----------------------------------|--------------------|--------------------------|--------------------------|--------------------------|--------------------------|
| Trajectory                       | 1<br>(REF)         | 5                        | 7                        | 8                        | 10                       |
| N                                | 11,738             | 45,288                   | 60,205                   | 25,177                   | 8,835                    |
| % of initial sample <sup>1</sup> | 89.1               | 94.0                     | 82.7                     | 77.2                     | 89.3                     |
| All-cause Deaths                 | 3393               | 10,466                   | 12,948                   | 4,819                    | 1,701                    |
| Model 3                          | 1.00               | <b>0.83 (0.80, 0.86)</b> | <b>0.70 (0.68, 0.73)</b> | <b>0.65 (0.62, 0.68)</b> | <b>0.64 (0.61, 0.68)</b> |
| CVD Deaths                       | 1104               | 3,302                    | 3,950                    | 1,456                    | 526                      |
| Model 3                          | 1.00               | <b>0.81 (0.76, 0.87)</b> | <b>0.65 (0.61, 0.70)</b> | <b>0.59 (0.54, 0.64)</b> | <b>0.59 (0.53, 0.65)</b> |
| Cancer Deaths                    | 671                | 2,357                    | 3,157                    | 1,193                    | 431                      |
| Model 3                          | 1.00               | 0.94 (0.86, 1.03)        | <b>0.88 (0.81, 0.96)</b> | <b>0.83 (0.76, 0.92)</b> | <b>0.85 (0.76, 0.97)</b> |

<sup>1</sup>(Number of participants after exclusions/Number of participants on original sample) X 100

Model 3: Age + Sex + + education + race + smoking status/dose + total energy intake + diet percent fat + alcohol consumption + red meat consumption + consumption of fruits + consumption of vegetables + vitamin/mineral supplementation + body mass index at age 18 years

Abbreviations: REF: Referent group

**eTable 8.** Hazard Ratios (95% Confidence Intervals) Among Increases and Decreases After Excluding Individuals With Trajectory Assignment Probabilities Lower Than 80%

|                                  |            | Increases                |                          | Decreases                |                          |                          |
|----------------------------------|------------|--------------------------|--------------------------|--------------------------|--------------------------|--------------------------|
| Trajectory                       | 1<br>(REF) | 2                        | 3                        | 4                        | 6                        | 9                        |
| N                                | 11,738     | 23,760                   | 11,859                   | 6,979                    | 35,472                   | 41,124                   |
| % of initial sample <sup>1</sup> | 89.1       | 94.7                     | 73.7                     | 42.0                     | 99.0                     | 91.9                     |
| All-cause Deaths                 | 3,393      | 4,307                    | 2,198                    | 1,897                    | 10,056                   | 9,891                    |
| Model 3                          | 1.00       | <b>0.64 (0.61, 0.67)</b> | <b>0.67 (0.64, 0.71)</b> | <b>0.96 (0.91, 1.02)</b> | <b>0.96 (0.92, 0.99)</b> | <b>0.86 (0.83, 0.89)</b> |
| CVD Deaths                       | 1,104      | 1,248                    | 589                      | 551                      | 3,268                    | 3,196                    |
| Model 3                          | 1.00       | <b>0.56 (0.51, 0.60)</b> | <b>0.56 (0.51, 0.62)</b> | <b>0.89 (0.80, 0.99)</b> | 0.96 (0.90, 1.03)        | <b>0.86 (0.80, 0.92)</b> |
| Cancer Deaths                    | 671        | 1,070                    | 532                      | 399                      | 2,078                    | 2,274                    |
| Model 3                          | 1.00       | <b>0.83 (0.75, 0.91)</b> | <b>0.82 (0.73, 0.92)</b> | 1.00 (0.88, 1.13)        | 0.98 (0.90, 1.07)        | 0.98 (0.89, 1.07)        |

<sup>1</sup>(Number of participants after exclusions/Number of participants on original sample) X 100

Model 3: Age + Sex + education + race + smoking status/dose + total energy intake + diet percent fat + alcohol consumption + red meat consumption + consumption of fruits + consumption of vegetables + vitamin/mineral supplementation + body mass index at age 18 years

Abbreviations: REF: Referent group

55. Read the list of examples of moderate and vigorous activities in the box below.

| EXAMPLES OF MODERATE AND VIGOROUS ACTIVITIES: |                     |                           |                 |
|-----------------------------------------------|---------------------|---------------------------|-----------------|
| Tennis                                        | Heavy gardening     | Cheerleading/drill team   | Rowing          |
| Golf (walking)                                | Weight lifting      | Handball/racquetball      | Aerobics        |
| Biking                                        | Basketball/baseball | Hiking/climbing mountains | Jogging/running |
| Swimming                                      | Football/soccer     | Fast walking/fast dancing | Heavy housework |

Think back to the ages and times listed in the table below. Mark the circles that best describe how often you participated in moderate and vigorous activities at the ages and time listed. DO NOT INCLUDE ACTIVITIES THAT YOU REPORTED IN QUESTIONS 48 - 51 ON PAGE 13.

| How often did you participate in moderate and vigorous activities at the following ages and time? | HOW OFTEN (MARK ONLY ONE RESPONSE) |                       |                                       |                       |                       |                            |
|---------------------------------------------------------------------------------------------------|------------------------------------|-----------------------|---------------------------------------|-----------------------|-----------------------|----------------------------|
|                                                                                                   | Never                              | Rarely                | Weekly, but less than 1 hour per week | 1-3 hours per week    | 4-7 hours per week    | More than 7 hours per week |
| 15-18 years old                                                                                   | <input type="radio"/>              | <input type="radio"/> | <input type="radio"/>                 | <input type="radio"/> | <input type="radio"/> | <input type="radio"/>      |
| 19-29 years old                                                                                   | <input type="radio"/>              | <input type="radio"/> | <input type="radio"/>                 | <input type="radio"/> | <input type="radio"/> | <input type="radio"/>      |
| 35-39 years old                                                                                   | <input type="radio"/>              | <input type="radio"/> | <input type="radio"/>                 | <input type="radio"/> | <input type="radio"/> | <input type="radio"/>      |
| in the past 10 years                                                                              | <input type="radio"/>              | <input type="radio"/> | <input type="radio"/>                 | <input type="radio"/> | <input type="radio"/> | <input type="radio"/>      |

**eFigure 1.** Item Included in the AARP Risk Factor Questionnaire to Assess Participation in Leisure-Time Physical Activity at Ages 15-18 Years, 19-29 Years, 35-39 Years, and in the Previous 10 Years (Assumed as 40-61 Years).

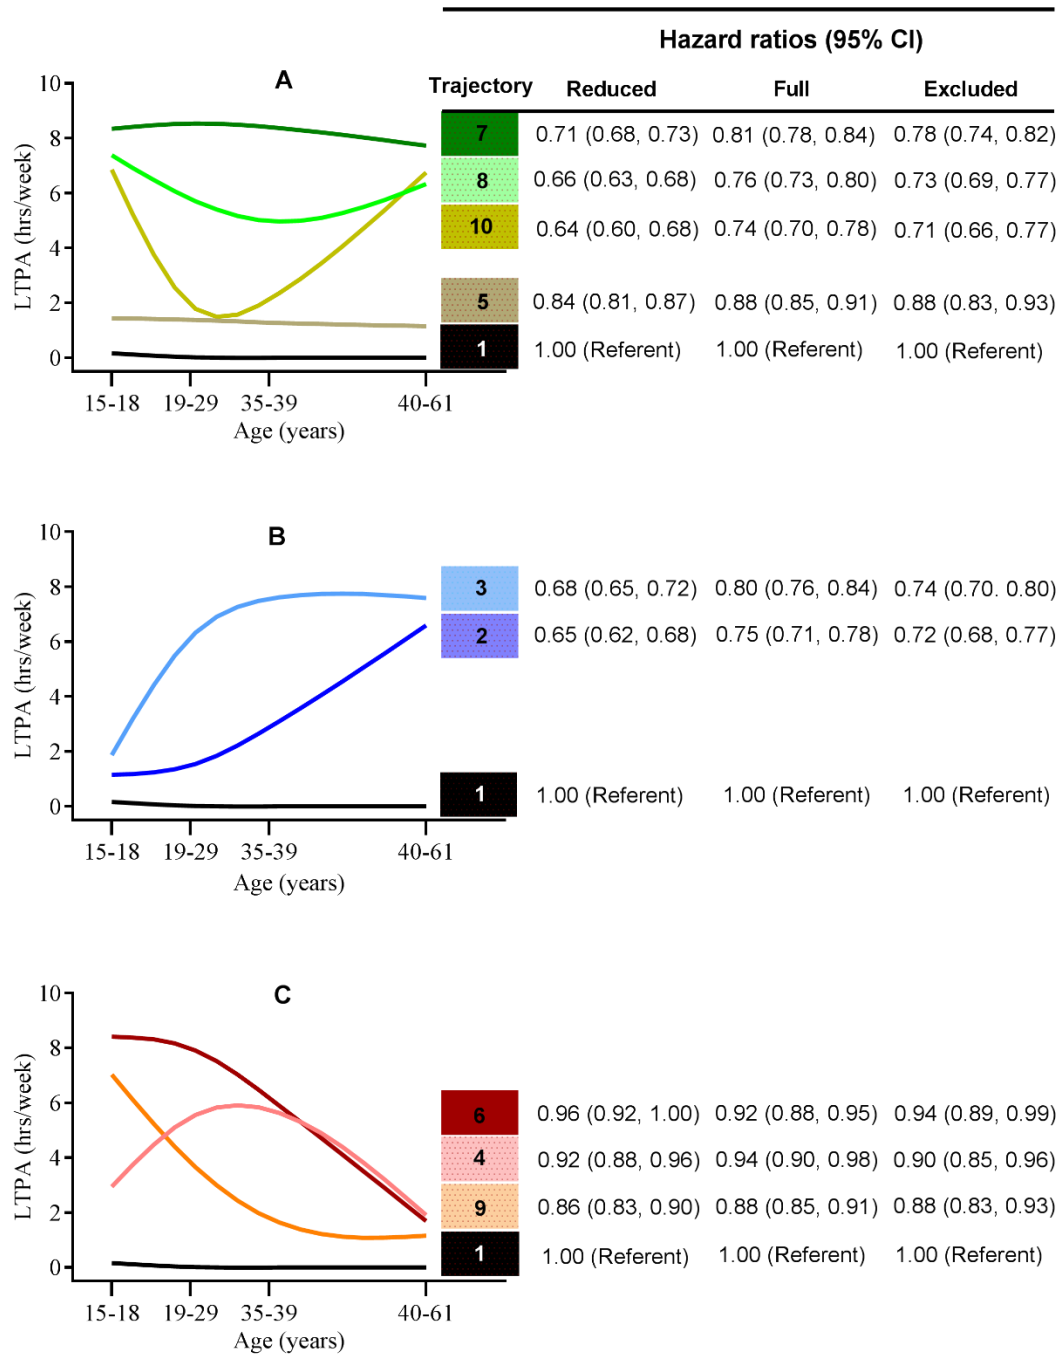

**eFigure 2.** Leisure-Time Physical Activity (LTPA) Trajectories and Respective Hazard Ratios (95% Confidence Intervals) for All-Cause Mortality Among Maintainers (A), Increasers (B), and Decreasers (C). “Reduced” model hazard ratios were computed using model 3 and are not adjusted for disease conditions. Covariates include: age, sex, education, race, smoking status/dose, total energy intake, diet percent fat, alcohol consumption, red meat consumption, consumption of fruits, consumption of vegetables, vitamin/mineral supplementation, body mass

index at age 18 years. “Full” model hazard ratios include all covariates listed above and are further adjusted for prevalent conditions reported at age 50-71 years (i.e., baseline), including: heart disease, cancer, diabetes, stroke, emphysema, and overall health status. “Excluded” hazard ratios does not include participants with reported health conditions at age 50-71 years (heart disease, cancer, diabetes, stroke, emphysema, and overall health status) and covariates include: age, sex, education, race, smoking status/dose, total energy intake, diet percent fat, alcohol consumption, red meat consumption, consumption of fruits, consumption of vegetables, vitamin/mineral supplementation and, body mass index at age 18 years.

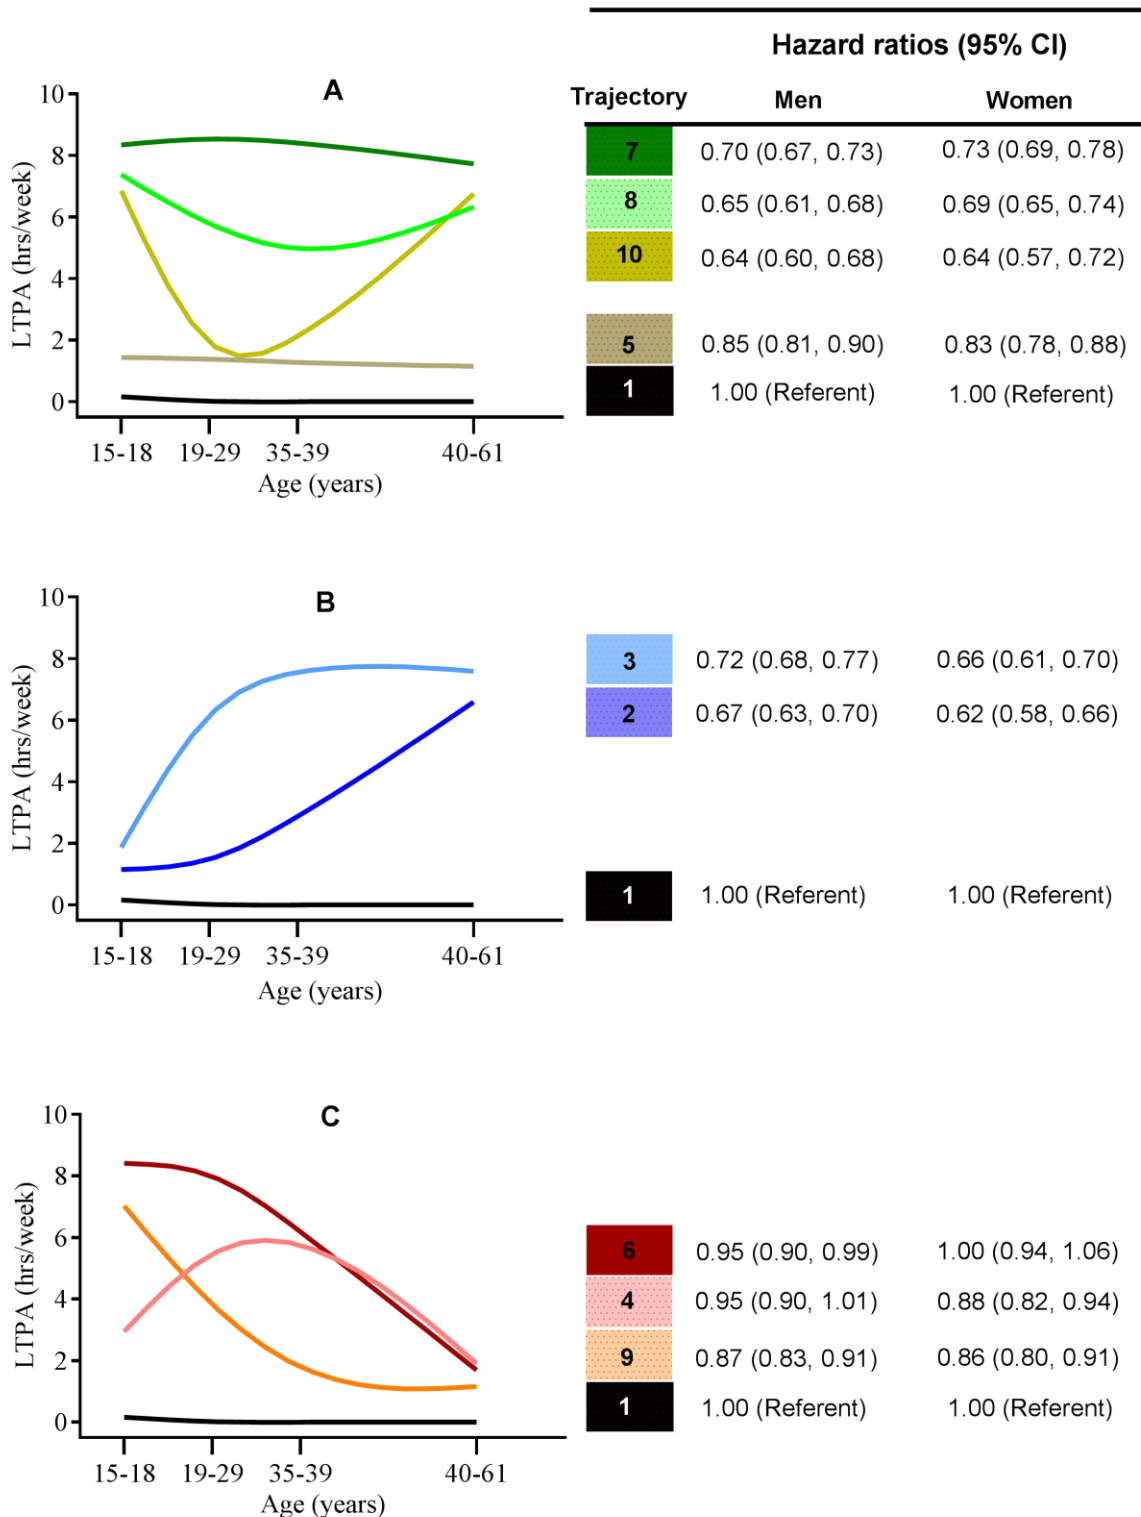

**eFigure 3.** Leisure-Time Physical Activity (LTPA) Trajectories and Respective Hazard Ratios (95% Confidence Intervals) for Men (n=183,453) and Women (n=131,606). Hazard ratios are provided for all-cause mortality among maintainers (A), increasers (B), and decreasers (C). Hazard ratios



were computed separately for all-cause mortality outcome using trajectory 1 as the referent group. Hazard ratios were adjusted for: age, sex, education, race, smoking status/dose, total energy intake, diet percent fat, alcohol consumption, red meat consumption, consumption of fruits, consumption of vegetables, vitamin/mineral supplementation and, body mass index at age 18 years.

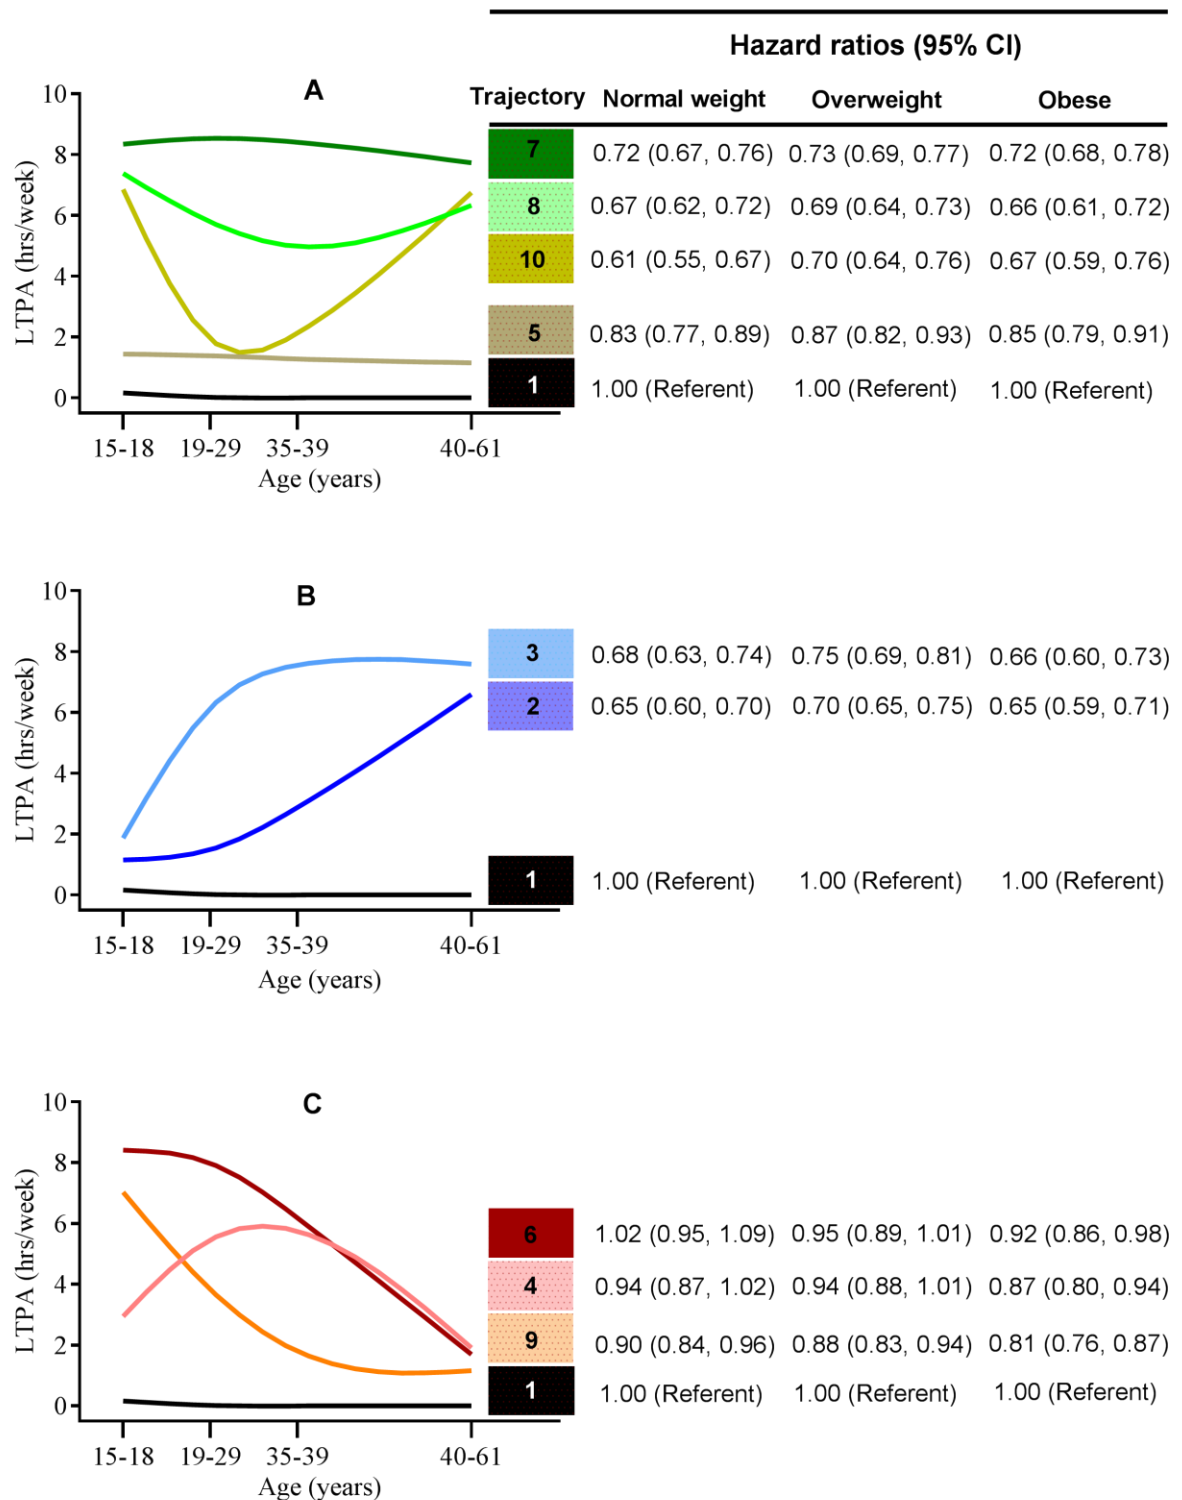

**eFigure 4.** Leisure-Time Physical Activity (LTPA) Trajectories and Respective Hazard Ratios (95% Confidence Intervals) for All-Cause Mortality Among Maintainers (A), Increasers (B), and Decreasers (C). Hazard ratios are adjusted for: age, sex, education, race, smoking status/dose,

total energy intake, diet percent fat, alcohol consumption, red meat consumption, consumption of fruits, consumption of vegetables, vitamin/mineral supplementation and, body mass index at age 18 years. Hazard ratios are stratified for BMI classification [normal weight (n=114,450), overweight (n=129,631), and obese (n=64,917)] at 50-71 years (i.e., baseline) using participants in trajectory 1 as the referent group. Body mass index at 50-71 years from 6,061 participants were missing.
